# Supplementary material for: Isolation, Purification, and Antimicrobial Characterization of Cannabidiolic Acid and Cannabidiol from Cannabis sativa L
Source: PubMed Central journal article supplement (PMC7355595; doi:10.3390/biom10060900), 2020-06-12
Supplement: biomolecules-10-00900-s001.pdf [file biomolecules-10-00900-s001.pdf]

# Isolation, Purification, and Antimicrobial Characterization of Cannabidiolic Acid and Cannabidiol from *Cannabis sativa* L.

Laura Daniela Martinenghi, Rie Jønsson, Torben Lund and Håvard Jenssen \*

Department of Science and Environment, Roskilde University, 4000 Roskilde, Denmark; laumarti80@yahoo.es (L.D.M.); riejonsson@gmail.com (R.J.); tlund@ruc.dk (T.L.)

\* Correspondence: jenssen@ruc.dk; Tel.: +45 4674 2877

## Supplementary data

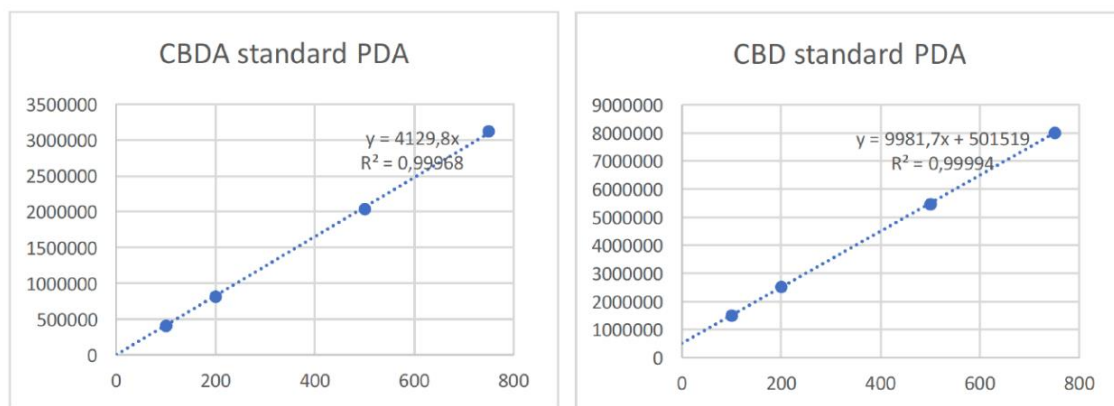

**Figure S1.** CBDA and CBD standard curves. Plotted at concentrations 100, 200, 500, and 750 µg/mL. On the y-axis the integration numbers corresponding to the area under the peak and on the x-axis the concentration of the compounds. Concentration of the samples were obtained by either using the graph or the linear equation.

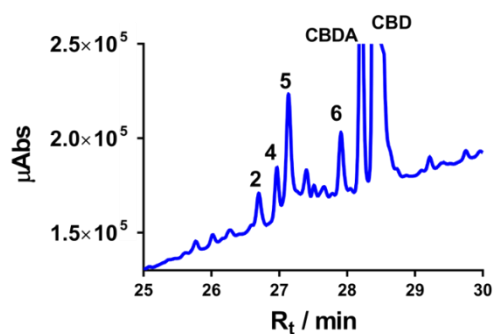

| Compound | R <sub>t</sub> /min | %Area | λ <sub>max</sub> /nm | m/z |
|----------|---------------------|-------|----------------------|-----|
| 2        | 26.70               | 0.8   | 270                  | 331 |
| 4        | 26.96               | 0.8   | 272                  | ?   |
| 5        | 27.14               | 2.2   | 277                  | 345 |
| 6        | 27.91               | 1.2   | 272                  | ?   |
| CBDA     | 28.21               | 5.7   | 307                  | 359 |
| CBD      | 28.43               | 89.7  | 274                  | 315 |

**Figure S2.** CBD chromatogram and retention-time table. CBD sample purified. The LC-UV/vis chromatogram is plotted in λ<sub>max</sub> mode between 225–800 nm. The layout is a zoomed version of Figure 2C from the main manuscript, to better illustrate the small peaks with contaminants. Integration of chromatogram are found in the table to the right.

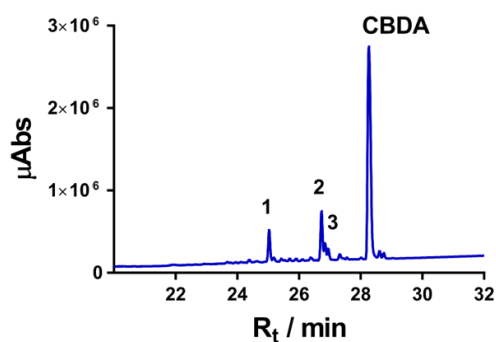

| Compound | R <sub>t</sub> /min | %Area | λ <sub>max</sub> /nm | m/z |
|----------|---------------------|-------|----------------------|-----|
| 1        | 24.38               | 3.1   | 343                  | 343 |
| 2        | 26.73               | 9.8   | 307                  | 331 |
| 3        | 26.95               | 2.3   | 300                  | 375 |
| CBDA     | 28.26               | 84.9  | 307                  | 359 |

**Figure S3.** CBDA chromatogram and retention-time table. CBDA sample purified. The LC-UV/vis chromatogram is plotted in λ<sub>max</sub> mode between 225–800 nm. The chromatogram is matching CBDA Figure 2C from the main manuscript. Integration of chromatogram are found in the table to the right.
